# Supplementary material
Source: PubMed Central journal article supplement (PMC3212836)
Supplement: NIHMS330759-supplement-Appendix_1.pdf [file NIHMS330759-supplement-Appendix_1.pdf]

**Appendix 1.** Directed Acyclic Graph (DAG) Representing the Effect of Soda Policy Change on Soda Consumption

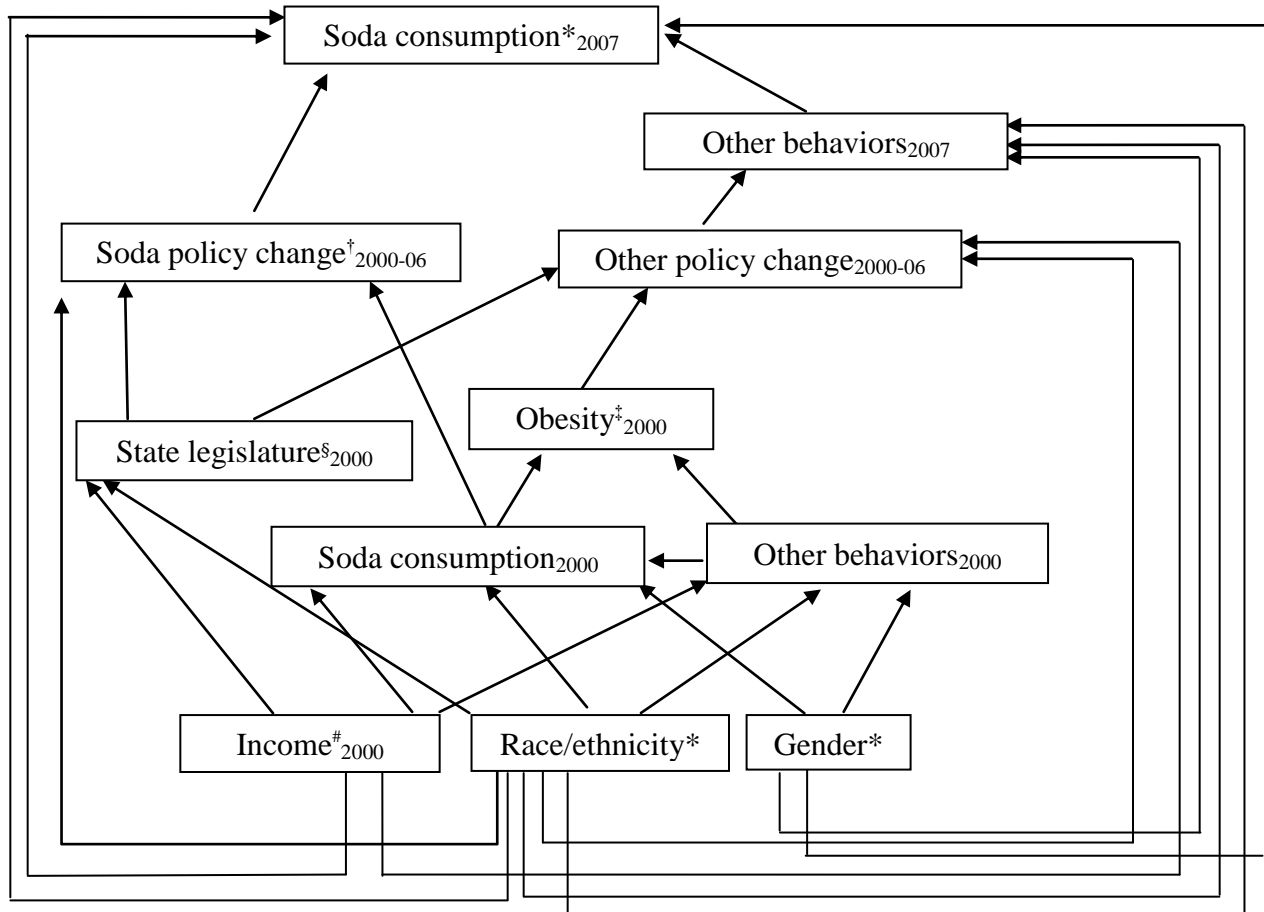

\* Obtained from 2007 Youth Risk Behavior Survey

† Obtained from 2000 and 2006 School Health Policies and Programs Study

‡ State adult obesity prevalence, obtained from the 2000 Behavioral Risk Factor Surveillance System

§ Whether state legislature is controlled by Democratic party

# State median income, obtained from the U.S. Census
