# Supplementary material
Source: PubMed Central journal article supplement (PMC3212836)
Supplement: NIHMS330759-supplement-Appendix_2.pdf [file NIHMS330759-supplement-Appendix_2.pdf]

**Appendix 2.** Distribution of 2006 State Policies Targeting Junk Food in Schools Among States That Reported Having no Policy in 2000\*, School Health Policies and Programs Study (SHPPS)

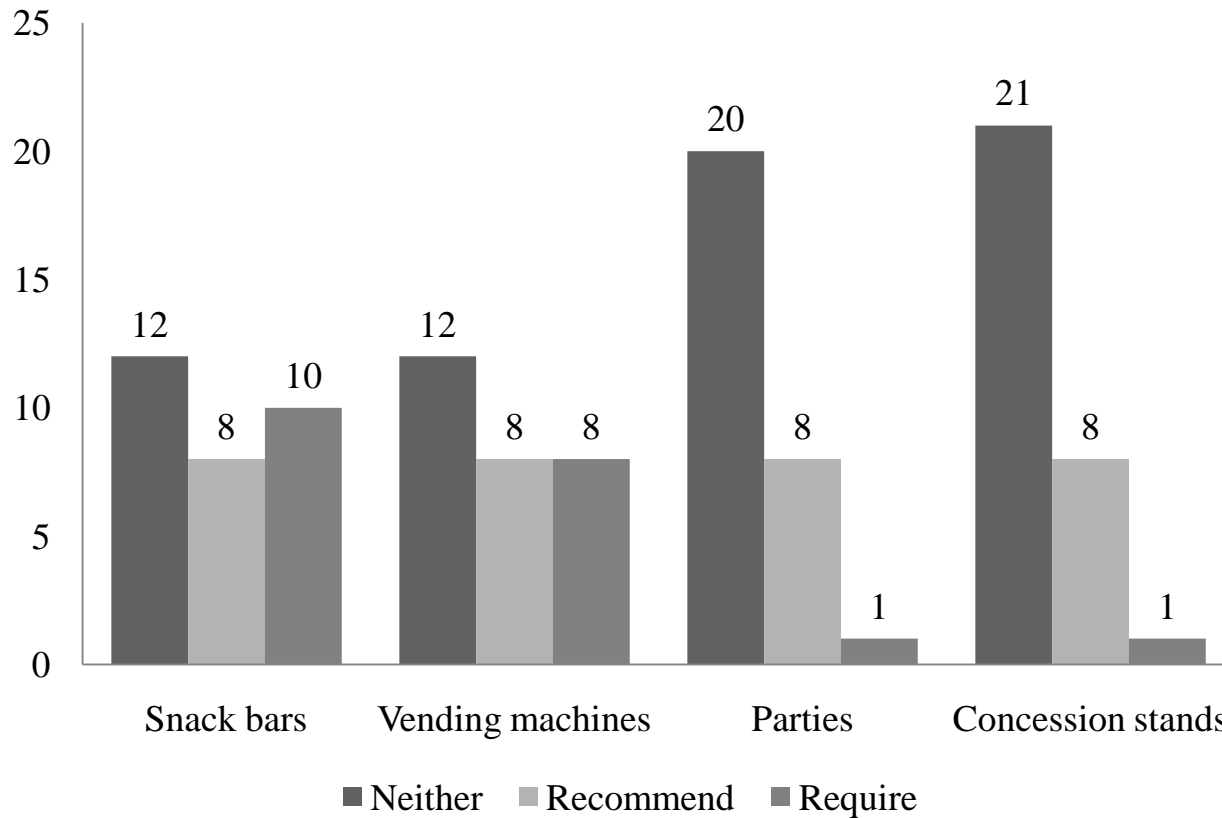

\* Among 34 states in the study sample, those that reported 'recommend' or 'require' in 2000 are excluded from the figures
